# Supplementary material for: Low-temperature synthesis of oval-shaped CoWO 4 nanomaterials for enhanced asymmetric supercapacitor performance
Source: Royal Society of Chemistry journal article supplement (doi:10.1039/d4ma00923a), 2024-12-04
Supplement: d4ma00923a1.pdf [file d4ma00923a1.pdf]

## Low-Temperature Synthesis of Oval-Shaped CoWO<sub>4</sub> Nanomaterials for Enhanced Asymmetric Supercapacitor Performance

Pruthvi B. Patel<sup>a,c</sup>, Dharti Patel<sup>a,c</sup>, Anita R. Patel<sup>a,c</sup>, Sanjay N. Bariya<sup>d</sup>, Yash G. Kapdi<sup>d</sup>, Vanaraj Solanki<sup>c</sup>, Saurabh S. Soni<sup>d,\*</sup> and Mitesh H. Patel<sup>b,c\*</sup>

<sup>a</sup>P. D. Patel Institute of Applied Sciences, Charotar University of Science and Technology, Changa, Anand District, Gujarat 388421, India

<sup>b</sup>Analube Lab, Pramukh Swami Center of Excellence for Renewable Energy, Charotar University of Science and Technology, Changa, Anand District, Gujarat 388421, India

<sup>c</sup>Dr. K. C. Patel Research and Development Centre, Charotar University of Science and Technology Changa, Anand District, Gujarat 388421, India

<sup>d</sup>Department of Chemistry, Sardar Patel University, Vallabh Vidyanagar, Gujarat 388120, India

**Corresponding Authors:** miteshpatel.bio@charusat.ac.in, soni\_b21@yahoo.co.in

## 1. Crystallographic information file for Rietveld refinement

```
#-----  
#$Date: 2016-02-13 21:28:24 +0200 (Sat, 13 Feb 2016) $  
#$Revision: 176429 $  
#$URL: svn://www.crystallography.net/cod/cif/8/10/36/8103677.cif $  
#-----  
#  
# This file is available in the Crystallography Open Database (COD),  
# http://www.crystallography.net/  
#  
# All data on this site have been placed in the public domain by the  
# contributors.  
#  
data_8103677  
loop_  
_publ_author_name  
'Weitzel, H.'  
_publ_section_title  
;  
Kristallstrukturverfeinerung von Wolframiten und Columbiten  
;  
_journal_name_full  
;  
Zeitschrift fuer Kristallographie, Kristallgeometrie, Kristallphysik,  
Kristallchemie (-144,1977)  
;  
_journal_page_first      238  
_journal_page_last      258
```

\_journal\_volume 144  
\_journal\_year 1976  
\_chemical\_formula\_sum 'Co O4 W'  
\_chemical\_name\_systematic 'Co (W O4)'  
\_space\_group\_IT\_number 13  
\_symmetry\_space\_group\_name\_Hall '-P 2yc'  
\_symmetry\_space\_group\_name\_H-M 'P 1 2/c 1'  
\_cell\_angle\_alpha 90  
\_cell\_angle\_beta 90  
\_cell\_angle\_gamma 90  
\_cell\_formula\_units\_Z 2  
\_cell\_length\_a 4.6698  
\_cell\_length\_b 5.6873  
\_cell\_length\_c 4.9515  
\_cell\_volume 131.505  
\_citation\_journal\_id\_ASTM ZEKGAX  
\_cod\_data\_source\_file Weitzel\_ZEKGAX\_1976\_1695.cif  
\_cod\_data\_source\_block Co1O4W1  
\_cod\_original\_cell\_volume 131.5047  
\_cod\_original\_formula\_sum 'Co1 O4 W1'  
\_cod\_database\_code 8103677

loop\_

\_symmetry\_equiv\_pos\_as\_xyz

x,y,z

-x,y,-z+1/2

-x,-y,-z

x,-y,z-1/2

loop\_

\_atom\_site\_label

\_atom\_site\_type\_symbol

\_atom\_site\_fract\_x

\_atom\_site\_fract\_y

\_atom\_site\_fract\_z

\_atom\_site\_occupancy

\_atom\_site\_U\_iso\_or\_equiv

O2 O-2 0.254 0.3757 0.3939 1 0.0

W1 W+6 0 0.1773 0.25 1 0.0

O1 O-2 0.2176 0.108 0.9321 1 0.0

Co1 Co+2 0.5 0.6712 0.25 1 0.0

**Table S.I. 1. Comparison of electrochemical data of various AWO<sub>4</sub> samples published previously to those acquired in the present study.**

| Material                                                    | Synthesis method                            | Temp (°C)           | Time (hr.) | Electrolyte                          | Scan rate            | Specific capacitance | Capacity retention / Cyclic stability | Reference           |
|-------------------------------------------------------------|---------------------------------------------|---------------------|------------|--------------------------------------|----------------------|----------------------|---------------------------------------|---------------------|
| CoWO <sub>4</sub> powder                                    | Sol-gel green method                        | 800                 | 2          | 3M KOH                               | 1 A/g                | 77 C/g               | 98% / 1000 at 1A/g                    | 12                  |
| CoWO <sub>4</sub> nanocrystals                              | Polymeric precursor method                  | 800                 | 4          | Na <sub>2</sub> SO <sub>4</sub>      | 5 mV/s               | 249 F/g              | -                                     | 19                  |
| MnWO <sub>4</sub>                                           | Microwave assisted method                   | 80                  | 5 min.     | 0.1M Na <sub>2</sub> SO <sub>4</sub> | 1 mA/cm <sup>2</sup> | 34 F/g               | -                                     | 39                  |
| CoWO <sub>4</sub> nanostructures                            | Microwave mediated method                   | 500                 | 2          | 2M KOH                               | 0.25 A/g             | 45 F/g               | -                                     | 40                  |
| CoWO <sub>4</sub> powder                                    | Co-precipitation method                     | 450                 | 2          | 6M KOH                               | 2 A/g                | 97 F/g               | -                                     | 41                  |
| Flower like CoWO <sub>4</sub>                               | Hydrothermal method                         | 150                 | 10         | 2M KOH                               | 5 mV/s               | 154 F/g              | -                                     | 42                  |
| CoWO <sub>4</sub> nanocrystalline                           | One pot hydrothermal method                 | 180                 | 12         | 2M KOH                               | 5 mV/s               | 60.6 F/g             | 88.1 % / 1000 at 1 A/g                | 43                  |
| graphene oxide/CoWO <sub>4</sub> nanocomposite              | One pot hydrothermal method                 | 180                 | 12         | 2M KOH                               | 5 mV/s               | 159.9 F/g            | 94.7 % / 1000 at 1 A/g                | 43                  |
| Large chain like NiWO <sub>4</sub>                          | Self-assembled method                       | 60                  | 1.5        | 2M KOH                               | 5 mV/s               | 134 F/g              | 82 % / 1000 at 2 mA/cm <sup>2</sup>   | 44                  |
| Small chain like NiWO <sub>4</sub>                          | Self-assembled method                       | 60                  | 1.5        | 2M KOH                               | 5 mV/s               | 173 F/g              | 90 % / 1000 at 2 mA/cm <sup>2</sup>   | 44                  |
| CuWO <sub>4</sub> nanopowder                                | Microwave irradiation assisted method       | 600                 | 6          | 0.5M HCl                             | 20 mV/s              | 77 F/g               | -                                     | 45                  |
| Sulphur doped cobalt tungstate nanosphere                   | Hydrothermal method                         | 140                 | 10         | 1 M KOH                              | 1.33 A/g             | 177.25 F/g           | 94.85 % / 10,000 at 6 A/g             | 46                  |
| CoWO <sub>4</sub>                                           | Wet chemical method                         | Ambient temperature | ~14        | 1 M KOH                              | 1A/g                 | 128 F/g              | -                                     | 47                  |
| CoWO <sub>4</sub> / Ni nanocomposite (CWO/Ni <sub>3</sub> ) | Wet chemical method                         | Ambient temperature | ~18        | 6 M KOH                              | 1 A/g                | 271 F/g              | 86.4% / 1500 at 5 A/g                 | 47                  |
| CoWO <sub>4</sub>                                           | Hydrothermal method                         | 180                 | 8          | 3 M KOH                              | 2 A/g                | 262.7 F/g            | -                                     | 48                  |
| CoWO <sub>4</sub> / reduced graphene oxide                  | Hydrothermal method                         | 180                 | 8          | 3 M KOH                              | 2 A/g                | 382.7 F/g            | 96 % / 5000 at 10 A/g                 | 48                  |
| Chain like ZnWO <sub>4</sub>                                | Sonochemical method                         | 600                 | 3          | 1 M KOH                              | 5 mV/s               | 602 F/g              | 93 % / 3000 at 100 mV/s               | 49                  |
| CoWO <sub>4</sub> nanostructures                            | Hydrothermal method followed by calcination | 300                 | 2          | 1M KOH                               | 10 mV/s              | 235 F/g              | 93.25 % / 10,000 at 1 A/g             | <b>Present work</b> |

## 2. XRD data of CWO electrode

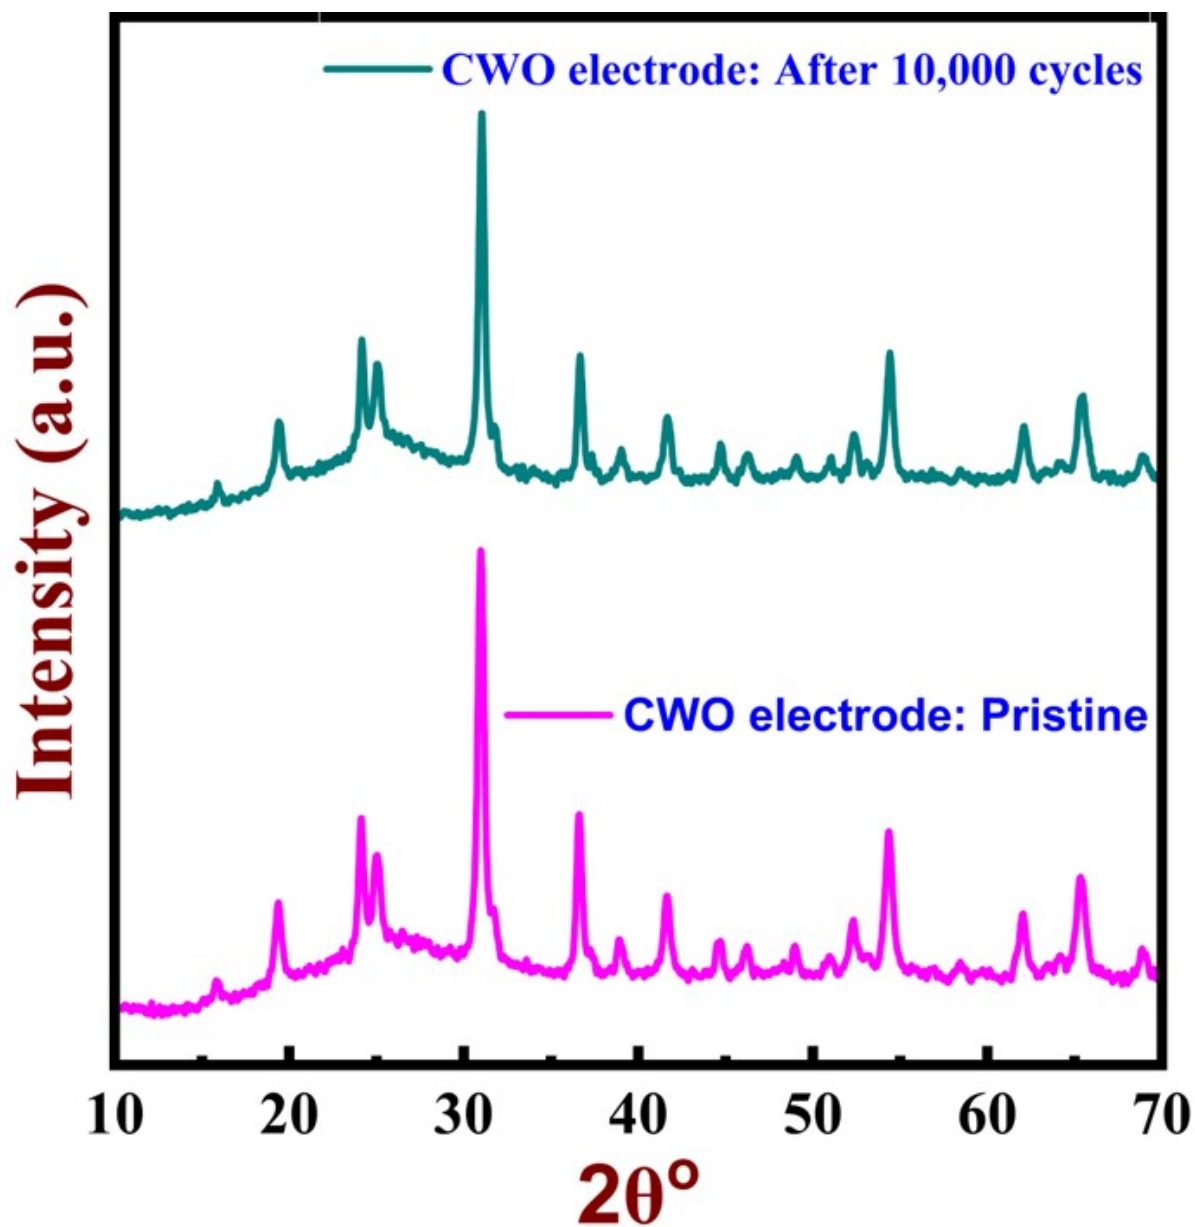

S.I. 1. XRD pattern of CWO electrode before and after 10,000 cycles
